# Supplementary material for: Poincaré Maps and Aperiodic Oscillations in Leukemic Cell Proliferation Reveal Chaotic Dynamics
Source: Cells. 2021 Dec 19;10(12):3584. doi: 10.3390/cells10123584 (PMC8700028; doi:10.3390/cells10123584)
Supplement: Supplementary file 1 [file cells-10-03584-s001.zip › Tabel S1 Cell Proliferation Data.xlsx]

## Sheet: 20cells per μl
Experiment I (2005)			Experiment III (2007)
Final Volume (ml)	Total Cells	Cells per μl	Final Volume (ml)	Cells per μl (F1)	TOTAL CELLS (F1)	τotal Cells	Cells per ul (F2)	Ημέρα	Average	StDev		Average	StDev
24.8	496000	20	24.8	20	500000	496000	20	-1	20	0		496000	0
24.6	496000	20	24.6	20	500000	496000	20	0	20	0		496000	0
24.4	492000	20	24.4	20	500000	492000	20	1	20	0		492000	0
24.2	488000	20	24.2	20	500000	488000	20	2	20	0		488000	0
24	484000	20	24	20	500000	484000	20	3	20	0		484000	0
23.8	480000	20	23.8	20	500000	480000	20	4	20	0		480000	0
23.6	476000	20	23.6	20	500000	476000	20	5	20	0		476000	0
23.4	472000	20	23.4	20	500000	472000	20	6	20	0		472000	0
23.2	468000	20	23.2	20	500000	468000	20	7	20	0		468000	0
22	464000	20	23	20	500000	464000	20	8	20	0		464000	0
21.8	436	20	22.8	100	2478.26	2280	100	9	100	0		1358	922
21.6	436000	20	22.6	100	2500000	2280000	200	10	150	50		1358000	922000
21.4	2160000	100	22.4	400	10000000	9040000	400	11	400	0		5600000	3440000
21.2	2140000	100	22.2	2500	62500000	56000000	2500	14	2500	0		29070000	26930000
21	2120000	100	24.8	3000	75000000	66600000	3100	15	3050	50		34360000	32240000
20.8	4200000	200	24.6	3200	80000000	79360000	3500	16	3350	150		41780000	37580000
20.6	10400000	500	24.4	6600	1.65041e+08	162400000	6100	17	6350	250		86400000	76000000
20.4	14420000	700	24.2	7900	1.97541e+08	192800000	8100	20	8000	100		103610000	89190000
20.2	18360000	900	25	7800	1.95041e+08	188800000	7900	21	7850	50		103580000	85220000
20	18180000	900	24.8	6800	170000000	170000000	6800	22	6800	0		94090000	75910000
19.8	20000000	1000	24.6	9000	225000000	223200000	8500	23	8750	250		121600000	101600000
18.1	21780000	1100	25	9700	2.4248e+08	238600000	9200	24	9450	250		130190000	108410000
17.9	21720000	1200	24.8	11500	287500000	287500000	12300	27	11900	400		154610000	132890000
17.7	21480000	1200	24.6	12100	3.0252e+08	300100000	12000	28	12050	50		160790000	139310000
17.5	23010000	1300	24.4	12800	3.2002e+08	314900000	13000	29	12900	100		168955000	145945000
17.3	23100000	1320	24.2	12900	3.22541e+08	314800000	13100	30	13000	100		168950000	145850000
17.1	24390000	1410	25	13700	3.42459e+08	331500000	14000	31	13850	150		177945000	153555000
16.9	24280000	1420	24.8	13300	332500000	332500000	13600	34	13450	150		178390000	154110000
16.7	24840000	1470	24.6	14000	350000000	347200000	14000	38	14000	0		186020000	161180000
16.5	24220000	1450	24.4	16800	4.2002e+08	413300000	16700	44	16750	50		218760000	194540000
16.3	24590000	1490	25	19200	4.8002e+08	468500000	19500	52	19350	150		246545000	221955000
16.1	26080000	1600	24.8	15600	390000000	390000000	15700	53	15650	50		208040000	181960000
25	25760000	1600	24.6	17700	4.4254e+08	439000000	16900	55	17300	400		232380000	206620000
24.8	19000000	760	24.4	18000	450000000	442800000	17700	56	17850	150		230900000	211900000
24.6	18850000	760	25	18500	462500000	451400000	18400	57	18450	50		235125000	216275000
24.4	20660000	840	24.8	15900	397500000	397500000	16100	58	16000	100		209080000	188420000
24.2	21960000	900	24.6	17500	437500000	434000000	16700	59	17100	400		227980000	206020000
24	19360000	800	24.4	18200	4.5498e+08	447700000	18000	60	18100	100		233530000	214170000
23.8	21600000	900	25	19800	4.9498e+08	483100000	19300	62	19550	250		252350000	230750000
23.6	21420000	900	24.8	16700	417500000	417500000	16000	63	16350	350		219460000	198040000
23.4	21240000	900	24.6	17100	4.2752e+08	424100000	16800	64	16950	150		222670000	201430000
23.2	21060000	900	24.4	17500	437500000	430500000	17500	65	17500	0		225780000	204720000
23	23200000	1000	25	18900	4.72541e+08	461200000	18700	66	18800	100		242200000	219000000
25	23000000	1000	24.8	17000	425000000	425000000	16200	69	16600	400		224000000	201000000
24.8	25000000	1000	24.6	17300	4.3246e+08	429000000	16800	70	17050	250		227000000	202000000
24.6	29760000	1200	25	17500	437500000	430500000	16900	71	17200	300		230130000	200370000
25	41820000	1700	24.8	15100	377500000	377500000	14800	72	14950	150		209660000	167840000
24.8	25000000	1000	24.6	15900	3.9748e+08	394300000	15600	73	15750	150		209650000	184650000
23.6	69440000	2800	25	18200	4.5498e+08	447700000	16500	76	17350	850		258570000	189130000
23.4	110900000	4700	24.8	15000	375000000	375000000	14800	77	14900	100		242950000	132050000
23.2	124000000	5300	24.6	15300	3.8246e+08	379400000	15700	78	15500	200		251700000	127700000
23	139200000	6000	24.4	16200	4.0498e+08	398500000	16200	79	16200	0		268850000	129650000
22.8	138000000	6000	50	16600	4.14959e+08	405000000	16500	80	16550	50		271500000	133500000
22.6	152800000	6700	49.8	9700	485000000	485000000	9600	85	9650	50		318900000	166100000
25	165000000	7300	49.6	9900	4.9498e+08	493000000	9900	86	9900	0		329000000	164000000
23.3	135000000	5400	49.4	9900	4.9496e+08	491000000	10000	87	9950	50		313000000	178000000
23.1	214400000	9200	49.2	10700	5.3502e+08	528600000	10700	91	10700	0		371500000	157100000
21.4	212500000	9200	49	11000	550000000	541200000	11100	92	11050	50		376850000	164350000
25	199000000	9300	48.8	10900	545000000	534100000	10900	93	10900	0		366550000	167550000
24.8	277500000	11100	50	11300	5.64959e+08	551400000	10900	94	11100	200		414450000	136950000
24.6	332300000	13400	49.8	7400	370000000	370000000	7100	95	7250	150		351150000	18850000
24.4	332100000	13500	49.6	8300	4.1496e+08	413300000	8500	97	8400	100		372700000	40600000
22.7	344000000	14100	49.4	8800	4.4002e+08	436500000	8600	98	8700	100		390250000	46250000
22.5	365500000	16100	50	9000	450000000	444600000	8900	99	8950	50		405050000	39550000
20.3	353300000	15700	49.8	7200	360000000	360000000	7200	100	7200	0		356650000	3350000
25	324800000	16000	49.6	7800	3.8996e+08	388400000	7700	101	7750	50		356600000	31800000
24.8	385000000	15400	49.4	8700	4.3498e+08	431500000	8300	103	8500	200		408250000	23250000
22.6	401800000	16200	49.2	8900	4.4504e+08	439700000	8500	104	8700	200		420750000	18950000
22.4	379700000	16800	49	8900	4.4502e+08	437900000	8500	105	8700	200		408800000	29100000
20.7	376300000	16800	48.8	9100	455000000	445900000	9000	106	9050	50		411100000	34800000
20.5	339500000	16400	48.6	9400	4.6998e+08	458700000	9100	107	9250	150		399100000	59600000
20.3	383400000	18700	50	9700	4.84979e+08	471400000	9500	108	9600	100		427400000	44000000
20.1	383700000	18900	49.8	7600	380000000	380000000	7200	109	7400	200		381850000	1850000
19.9	394000000	19600	49.6	8700	4.3504e+08	433300000	8200	111	8450	250		413650000	19650000
19.7	400000000	20100	49.4	8900	4.4496e+08	441400000	8500	112	8700	200		420700000	20700000
25	396000000	20100	49.2	9200	4.6002e+08	454500000	8500	113	8850	350		425250000	29250000
24.8	370000000	14800	49	9300	4.65041e+08	457600000	8800	114	9050	250		413800000	43800000
24.6	436500000	17600	50	9400	470000000	460600000	9300	115	9350	50		448550000	12050000
24.4	469900000	19100	49.8	8000	400000000	400000000	7800	116	7900	100		434950000	34950000
24.2	478200000	19600	49.6	8800	4.3996e+08	438200000	8700	118	8750	50		458200000	20000000
25	467100000	19300	49.4	9200	4.5998e+08	456300000	9100	119	9150	50		461700000	5400000
24.8	492500000	19700	50	9500	475000000	469300000	9300	120	9400	100		480900000	11600000
24.6	597700000	24100	49.8	8200	410000000	410000000	7800	121	8000	200		503850000	93850000
21.4	607600000	24700	49.6	9200	4.6004e+08	458200000	8800	122	9000	200		532900000	74700000
21.2	545700000	25500	49.4	9200	4.5998e+08	456300000	8900	123	9050	150		501000000	44700000
20.5	547000000	25800	50	9900	4.9504e+08	489100000	9600	125	9750	150		518050000	28950000
20.3	594500000	29000	49.8	7700	385000000	385000000	8200	126	7950	250		489750000	104750000
20.1	609000000	30000	49.6	8500	425000000	423300000	8900	127	8700	200		516150000	92850000
19.9	588900000	29300	49.4	8500	425000000	421600000	9200	128	8850	350		505250000	83650000
19.7	587100000	29500	49.2	9100	4.5496e+08	449500000	9300	129	9200	100		518300000	68800000
17.5	622500000	31600	49	9500	475000000	467400000	9600	130	9550	50		544950000	77550000
17.3	570500000	32600	48.8	9900	495000000	485100000	10000	132	9950	50		527800000	42700000
15.6	629700000	36400	48.6	10100	5.0502e+08	492900000	10200	133	10150	50		561300000	68400000
15.6	567800000		48.4	7600	3.80041e+08	369400000	10600	134	9100	1500		468600000	99200000
			48.2	7900	3.95041e+08	382400000	7800	135	7850	50		382400000	0
			48	6300	3.15041e+08	303700000	6800	136	6550	250		303700000	0
			47.8	6800	340000000	326400000	7300	137	7050	250		326400000	0
			47.6	7500	375000000	358500000	7900	139	7700	200		358500000	0
			47.4	8000	400000000	380800000	8600	140	8300	300		380800000	0
			47.2	8700	4.35021e+08	412400000	9000	141	8850	150		412400000	0
			47	8800	4.40042e+08	415400000	9300	142	9050	250		415400000	0
			46.8	8800	440000000	413600000	9300	143	9050	250		413600000	0
			46.6	9500	475000000	444600000	10000	146	9750	250		444600000	0
			46.4					149

## Sheet: 20cells per μl (means)
τελικός όγκος (ml)	Cells per μl (F1)	Average cells/ul (N)	Day		df /dx ()	|f'|					ln (xn)	423.064
24.8	20	20	-1		#DIV/0!						2.99573	Σ (ln)
24.6	20	20	0		#DIV/0!						2.99573
24.4	20	20	1		#DIV/0!						2.99573
24.2	20	20	2		#DIV/0!						2.99573
24	20	20	3		#DIV/0!						2.99573
23.8	20	20	4		#DIV/0!						2.99573
23.6	20	20	5		#DIV/0!						2.99573
23.4	20	20	6		#DIV/0!						2.99573
23.2	20	20	7		#DIV/0!						2.99573
23	20	20	8		0						2.99573
22.8	100	100	9		#DIV/0!		ln (f')	SUM ln (f')	lyapunov		4.60517
22.6	100	150	10		7	7	1.94591	3.13549	0.0746546		4.60517
22.4	400	400	11		0.238095	0.238095	-1.43508				5.99146
22.2	2500	2500	14		0.4	0.4	-0.916291				7.82405
24.8	3000	3050	15		17	17	2.83321				8.00637
24.6	3200	3350	16		0.382353	0.382353	-0.961411				8.07091
24.4	6600	6350	17		-0.0769231	0.0769231	-2.56495				8.79482
24.2	7900	8000	20		10	10	2.30259				8.97462
25	7800	7850	21		-2.2	2.2	0.788457				8.96188
24.8	6800	6800	22		0.318182	0.318182	-1.14513				8.82468
24.6	9000	8750	23		2.57143	2.57143	0.944462				9.10498
25	9700	9450	24		0.333333	0.333333	-1.09861				9.17988
24.8	11500	11900	27		1.16667	1.16667	0.154151				9.3501
24.6	12100	12050	28		0.142857	0.142857	-1.94591				9.40096
24.4	12800	12900	29		8	8	2.07944				9.4572
24.2	12900	13000	30		-0.5	0.5	-0.693147				9.46498
25	13700	13850	31		-1.75	1.75	0.559616				9.52515
24.8	13300	13450	34		4	4	1.38629				9.49552
24.6	14000	14000	38		0.857143	0.857143	-0.154151				9.54681
24.4	16800	16750	44		-1.5	1.5	0.405465				9.72913
25	19200	19350	52		-0.583333	0.583333	-0.538997				9.86267
24.8	15600	15650	53		0.142857	0.142857	-1.94591				9.65503
24.6	17700	17300	55		1.66667	1.66667	0.510826				9.78132
24.4	18000	17850	56		-5.2	5.2	1.64866				9.79813
25	18500	18450	57		-0.615385	0.615385	-0.485508				9.82553
24.8	15900	16000	58		0.4375	0.4375	-0.826679				9.67407
24.6	17500	17100	59		2.28571	2.28571	0.826679				9.76996
24.4	18200	18100	60		-1.9375	1.9375	0.661398				9.80918
25	19800	19550	62		-0.129032	0.129032	-2.04769				9.89344
24.8	16700	16350	63		1	1	0				9.72316
24.6	17100	16950	64		3.5	3.5	1.25276				9.74683
24.4	17500	17500	65		-1.35714	1.35714	0.305382				9.76996
25	18900	18800	66		-0.157895	0.157895	-1.84583				9.84692
24.8	17000	16600	69		0.666667	0.666667	-0.405465				9.74097
24.6	17300	17050	70		-12	12	2.48491				9.75846
25	17500	17200	71		-0.333333	0.333333	-1.09861				9.76996
24.8	15100	14950	72		2.875	2.875	1.05605				9.62245
24.6	15900	15750	73		-1.3913	1.3913	0.330242				9.67407
25	18200	17350	76		-0.09375	0.09375	-2.36712				9.80918
24.8	15000	14900	77		3	3	1.09861				9.61581
24.6	15300	15500	78		0.444444	0.444444	-0.81093				9.63561
24.4	16200	16200	79		-17.25	17.25	2.84781				9.69277
50	16600	16550	80								9.71716
49.8	9700	9650	85
49.6	9900	9900	86
49.4	9900	9950	87
49.2	10700	10700	91
49	11000	11050	92
48.8	10900	10900	93
50	11300	11100	94
49.8	7400	7250	95
49.6	8300	8400	97
49.4	8800	8700	98
50	9000	8950	99
49.8	7200	7200	100
49.6	7800	7750	101
49.4	8700	8500	103
49.2	8900	8700	104
49	8900	8700	105
48.8	9100	9050	106
48.6	9400	9250	107
50	9700	9600	108
49.8	7600	7400	109
49.6	8700	8450	111
49.4	8900	8700	112
49.2	9200	8850	113
49	9300	9050	114
50	9400	9350	115
49.8	8000	7900	116
49.6	8800	8750	118
49.4	9200	9150	119
50	9500	9400	120
49.8	8200	8000	121
49.6	9200	9000	122
49.4	9200	9050	123
50	9900	9750	125
49.8	7700	7950	126
49.6	8500	8700	127
49.4	8500	8850	128
49.2	9100	9200	129
49	9500	9550	130
48.8	9900	9950	132
48.6	10100	10150	133
48.4	7600	9100	134
48.2	7900	7850	135
48	6300	6550	136
47.8	6800	7050	137
47.6	7500	7700	139
47.4	8000	8300	140
47.2	8700	8850	141
47	8800	9050	142
46.8	8800	9050	143
46.6	9500	9750	146
46.4			149

## Sheet: 200cells per μl
Experiment IV (2007) flask1				Experiment IV (2007) flask2
Final Volume (ml)	Cells per μl	Total Cells	Day	Final Volume (ml)	Cells per μl	Total Cells	Day	TOTAL CELLS		cells/ul	StDev		Total	StDev
24.8	209	5183000	-1	24.8	209	5183000	-1	5.2248e+06		209	0		5183000	0
24.6	209	5183000	0	24.6	209	5183000	0	5.2248e+06		209	0		5183000	0
24.4	209	5141000	1	24.4	209	5141000	1	5.22459e+06		209	0		5141000	0
24.2	209	5100000	2	24.2	209	5100000	2	5.22541e+06		209	0		5100000	0
24	209	5058000	3	24	209	5058000	3	5.22521e+06		209	0		5058000	0
23.8	209	5016000	4	23.8	209	5016000	4	5225000		209	0		5016000	0
23.6	209	4974000	5	23.6	209	4974000	5	5.22479e+06		209	0		4974000	0
23.4	209	4932000	6	23.4	200	4720000	6	5000000		204.5	4.5		4826000	106000
23.2	209	4891000	7	23.2	200	4680000	7	5000000		204.5	4.5		4785500	105500
23	200	4640000	8	23	200	4640000	8	5000000		200	0		4640000	0
22.8	400	9200000	10	22.8	400	9200000	10	10000000		400	0		9200000	0
22.6	1000	22800000	11	22.6	1000	22800000	11	25000000		1000	0		22800000	0
22.4	4500	101700000	14	22.4	4700	106200000	14	1.17478e+08		4600	100		103950000	2250000
22.2	4600	103000000	15	22.2	4500	100800000	15	112500000		4550	50		101900000	1100000
24.8	3800	84360000	16	24.8	3900	86580000	16	97500000		3850	50		85470000	1110000
24.6	6900	171100000	17	24.6	6500	161200000	17	162500000		6700	200		166150000	4950000
24.4	9100	223900000	20	24.4	9100	223900000	20	2.27541e+08		9100	0		223900000	0
24.2	8900	217200000	21	24.2	9000	219600000	21	225000000		8950	50		218400000	1200000
25	7300	176700000	22	25	7500	181500000	22	187500000		7400	100		179100000	2400000
24.8	9700	242500000	23	24.8	8700	217500000	23	217500000		9200	500		230000000	12500000
24.6	10500	260400000	24	24.6	9900	245500000	24	2.4748e+08		10200	300		252950000	7450000
25	12500	307500000	27	25	11400	280400000	27	2.84959e+08		11950	550		293950000	13550000
24.8	11900	297500000	28	24.8	12400	310000000	28	310000000		12150	250		303750000	6250000
24.6	12800	317400000	29	24.6	13100	324900000	29	3.2752e+08		12950	150		321150000	3750000
24.4	13000	319800000	30	24.4	13300	327200000	30	3.3252e+08		13150	150		323500000	3700000
24.2	13300	324500000	31	24.2	14000	341600000	31	350000000		13650	350		333050000	8550000
25	13600	329100000	34	25	13500	326700000	34	337500000		13550	50		327900000	1200000
24.8	14000	350000000	38	24.8	14000	350000000	38	350000000		14000	0		350000000	0
24.6	16500	409200000	44	24.6	16700	414200000	44	4.1754e+08		16600	100		411700000	2500000
24.4	19000	467400000	52	24.4	19300	474800000	52	4.8252e+08		19150	150		471100000	3700000
25	15200	370900000	53	25	15900	388000000	53	3.97541e+08		15550	350		379450000	8550000
24.8	16600	415000000	55	24.8	17200	430000000	55	430000000		16900	300		422500000	7500000
24.6	17200	426600000	56	24.6	17800	441400000	56	4.4496e+08		17500	300		434000000	7400000
24.4	18400	452600000	57	24.4	18300	450200000	57	4.5752e+08		18350	50		451400000	1200000
25	15600	380600000	58	25	15600	380600000	58	3.89959e+08		15600	0		380600000	0
24.8	16500	412500000	59	24.8	16700	417500000	59	417500000		16600	100		415000000	2500000
24.6	17600	436500000	60	24.6	17900	443900000	60	4.4748e+08		17750	150		440200000	3700000
24.4	18600	457600000	62	24.4	18700	460000000	62	4.6748e+08		18650	50		458800000	1200000
25	15800	385500000	63	25	16400	400200000	63	4.10041e+08		16100	300		392850000	7350000
24.8	16700	417500000	64	24.8	17100	427500000	64	427500000		16900	200		422500000	5000000
24.6	17200	426600000	65	24.6	17500	434000000	65	437500000		17350	150		430300000	3700000
24.4	18400	452600000	66	24.4	18300	450200000	66	4.5752e+08		18350	50		451400000	1200000
25	16200	395300000	69	25	17300	422100000	69	4.3248e+08		16750	550		408700000	13400000
24.8	16100	402500000	70	24.8	17900	447500000	70	447500000		17000	900		425000000	22500000
24.6	16800	416600000	71	24.6	17900	443900000	71	4.4748e+08		17350	550		430250000	13650000
25	14300	351800000	72	25	15100	371500000	72	3.77541e+08		14700	400		361650000	9850000
24.8	14900	372500000	73	24.8	15700	392500000	73	392500000		15300	400		382500000	10000000
24.6	17200	426600000	76	24.6	17700	439000000	76	4.4254e+08		17450	250		432800000	6200000
25	14400	354200000	77	25	15800	388700000	77	3.9502e+08		15100	700		371450000	17250000
24.8	14600	365000000	78	24.8	15200	380000000	78	380000000		14900	300		372500000	7500000
24.6	16200	401800000	79	24.6	16200	401800000	79	4.0504e+08		16200	0		401800000	0
24.4	16100	396100000	80	24.4	17100	420700000	80	4.27541e+08		16600	500		408400000	12300000
50	9500	231800000	85	50	9700	236700000	85	4.85041e+08		9600	100		234250000	2450000
49.8	9600	480000000	86	49.8	10300	515000000	86	515000000		9950	350		497500000	17500000
49.6	9800	488000000	87	49.6	10100	503000000	87	5.0502e+08		9950	150		495500000	7500000
49.4	10900	540600000	91	49.4	11400	565400000	91	5.6996e+08		11150	250		553000000	12400000
49.2	11100	548300000	92	49.2	11300	558200000	92	5.6498e+08		11200	100		553250000	4950000
49	10900	536300000	93	49	10900	536300000	93	5.4502e+08		10900	0		536300000	0
50	11000	539000000	94	50	11600	568400000	94	580000000		11300	300		553700000	14700000
49.8	7400	370000000	95	49.8	7500	375000000	95	375000000		7450	50		372500000	2500000
49.6	8500	423300000	97	49.6	8800	438200000	97	4.3996e+08		8650	150		430750000	7450000
49.4	8900	441400000	98	49.4	9100	451400000	98	4.5504e+08		9000	100		446400000	5000000
50	9300	459400000	99	50	9300	459400000	99	4.6498e+08		9300	0		459400000	0
49.8	7200	360000000	100	49.8	7500	375000000	100	375000000		7350	150		367500000	7500000
49.6	7800	388400000	101	49.6	7500	373500000	101	375000000		7650	150		380950000	7450000
49.4	8700	431500000	103	49.4	8700	431500000	103	4.3498e+08		8700	0		431500000	0
49.2	8800	434700000	104	49.2	8900	439700000	104	4.4504e+08		8850	50		437200000	2500000
49	8800	433000000	105	49	9000	442800000	105	450000000		8900	100		437900000	4900000
48.8	9000	441000000	106	48.8	9100	445900000	106	455000000		9050	50		443450000	2450000
48.6	9600	468500000	107	48.6	9300	453800000	107	4.64959e+08		9450	150		461150000	7350000
50	9700	471400000	108	50	9800	476300000	108	4.90021e+08		9750	50		473850000	2450000
49.8	7800	390000000	109	49.8	7700	385000000	109	385000000		7750	50		387500000	2500000
49.6	8600	428300000	111	49.6	8500	423300000	111	425000000		8550	50		425800000	2500000
49.4	9200	456300000	112	49.4	9400	466200000	112	4.6996e+08		9300	100		461250000	4950000
49.2	9200	454500000	113	49.2	9400	464400000	113	4.7004e+08		9300	100		459450000	4950000
49	9300	457600000	114	49	9500	467400000	114	475000000		9400	100		462500000	4900000
50	9800	480200000	115	50	9600	470400000	115	480000000		9700	100		475300000	4900000
49.8	8000	400000000	116	49.8	8000	400000000	116	400000000		8000	0		400000000	0
49.6	9000	448200000	118	49.6	8700	433300000	118	4.3504e+08		8850	150		440750000	7450000
49.4	9400	466200000	119	49.4	8800	436500000	119	4.4002e+08		9100	300		451350000	14850000
50	9600	474200000	120	50	9400	464400000	120	4.7004e+08		9500	100		469300000	4900000
49.8	8300	415000000	121	49.8	8000	400000000	121	400000000		8150	150		407500000	7500000
49.6	8900	443200000	122	49.6	8700	433300000	122	4.3504e+08		8800	100		438250000	4950000
49.4	9200	456300000	123	49.4	9000	446400000	123	450000000		9100	100		451350000	4950000
50	9500	469300000	125	50	9500	469300000	125	475000000		9500	0		469300000	0
50	8100	405000000	126	49.8	7500	375000000	126	375000000		7800	300		390000000	15000000
50	8400	420000000	127	49.6	8100	403400000	127	4.0502e+08		8250	150		411700000	8300000
50	8900	445000000	128	49.4	8500	421600000	128	425000000		8700	200		433300000	11700000
50	8900	445000000	129	49.2	8500	419900000	129	425000000		8700	200		432450000	12550000
50	9200	460000000	130	49	8900	437900000	130	4.4502e+08		9050	150		448950000	11050000
50	9800	490000000	132	48.8	9200	450800000	132	460000000		9500	300		470400000	19600000
50	9900	495000000	133	48.6	9600	468500000	133	4.8002e+08		9750	150		481750000	13250000
50	10100	505000000	134	48.4	9800	476300000	134	4.90021e+08		9950	150		490650000	14350000
50	7800	390000000	135	48.4	7400	358200000	135	3.70041e+08		7600	200		374100000	15900000
50	6200	310000000	136	48.4	6900	334000000	136	3.45041e+08		6550	350		322000000	12000000
50	6900	345000000	137	48.4	7400	358200000	137	3.70041e+08		7150	250		351600000	6600000
50	7300	365000000	139	48.4	8000	387200000	139	400000000		7650	350		376100000	11100000
50	8200	410000000	140	48.4	8400	406600000	140	4.20041e+08		8300	100		408300000	1700000
50	8800	440000000	141	48.4	9000	435600000	141	450000000		8900	100		437800000	2200000
50	9100	455000000	142	48.4	9200	445300000	142	4.60021e+08		9150	50		450150000	4850000
50	8800	440000000	143	48.4	9200	445300000	143	4.60021e+08		9000	200		442650000	2650000
50	9900	495000000	147	48.4	9600	464600000	147	4.79959e+08		9750	150		479800000	15200000
50	10100	505000000	149	48.4	10000	484000000	149	500000000		10050	50		494500000	10500000
50			150	48.4			150

## Sheet: 200cells per μl (mean)
Final Volume (ml)	Cells per μl	Average cells/ul (N)	Day		df /dx ()	|f'|
24.8	209	209	-1		#DIV/0!
24.6	209	209	0		#DIV/0!
24.4	209	209	1		#DIV/0!
24.2	209	209	2		#DIV/0!
24	209	209	3		#DIV/0!
23.8	209	209	4		#DIV/0!
23.6	209	209	5		0
23.4	209	204.5	6		#DIV/0!		ln (f')	SUM ln (f')	lyapunov
23.2	209	204.5	7		-44.4444	44.4444	3.79424	4.35386	0.101252
23	200	200	8		3	3	1.09861
22.8	400	400	10		6	6	1.79176
22.6	1000	1000	11		-0.0138889	0.0138889	-4.27667
22.4	4500	4600	14		14	14	2.63906
22.2	4600	4550	15		-4.07143	4.07143	1.40399
24.8	3800	3850	16		0.842105	0.842105	-0.17185
24.6	6900	6700	17		-0.0625	0.0625	-2.77259
24.4	9100	9100	20		10.3333	10.3333	2.33537
24.2	8900	8950	21		-1.16129	1.16129	0.149532
25	7300	7400	22		0.555556	0.555556	-0.587787
24.8	9700	9200	23		1.75	1.75	0.559616
24.6	10500	10200	24		0.114286	0.114286	-2.16905
25	12500	11950	27		4	4	1.38629
24.8	11900	12150	28		0.25	0.25	-1.38629
24.6	12800	12950	29		2.5	2.5	0.916291
24.4	13000	13150	30		-0.2	0.2	-1.60944
24.2	13300	13650	31		-4.5	4.5	1.50408
25	13600	13550	34		5.77778	5.77778	1.75402
24.8	14000	14000	38		0.980769	0.980769	-0.0194181
24.6	16500	16600	44		-1.41176	1.41176	0.34484
24.4	19000	19150	52		-0.375	0.375	-0.980829
25	15200	15550	53		0.444444	0.444444	-0.81093
24.8	16600	16900	55		1.41667	1.41667	0.348307
24.6	17200	17500	56		-3.23529	3.23529	1.17412
24.4	18400	18350	57		-0.363636	0.363636	-1.0116
25	15600	15600	58		1.15	1.15	0.139762
24.8	16500	16600	59		0.782609	0.782609	-0.245122
24.6	17600	17750	60		-2.83333	2.83333	1.04145
24.4	18600	18650	62		-0.313725	0.313725	-1.15924
25	15800	16100	63		0.5625	0.5625	-0.575364
24.8	16700	16900	64		2.22222	2.22222	0.798508
24.6	17200	17350	65		-1.6	1.6	0.470004
24.4	18400	18350	66		-0.15625	0.15625	-1.8563
25	16200	16750	69		1.4	1.4	0.336472
24.8	16100	17000	70		-7.57143	7.57143	2.02438
24.6	16800	17350	71		-0.226415	0.226415	-1.48539
25	14300	14700	72		3.58333	3.58333	1.27629
24.8	14900	15300	73		-1.09302	1.09302	0.0889475
24.6	17200	17450	76		0.0851064	0.0851064	-2.46385
25	14400	15100	77		-6.5	6.5	1.8718
24.8	14600	14900	78		0.307692	0.307692	-1.17865
24.6	16200	16200	79		-17.5	17.5	2.8622
24.4	16100	16600	80		-0.05	0.05	-2.99573
50	9500	9600	85
49.8	9600	9950	86
49.6	9800	9950	87
49.4	10900	11150	91
49.2	11100	11200	92
49	10900	10900	93
50	11000	11300	94
49.8	7400	7450	95
49.6	8500	8650	97
49.4	8900	9000	98
50	9300	9300	99
49.8	7200	7350	100
49.6	7800	7650	101
49.4	8700	8700	103
49.2	8800	8850	104
49	8800	8900	105
48.8	9000	9050	106
48.6	9600	9450	107
50	9700	9750	108
49.8	7800	7750	109
49.6	8600	8550	111
49.4	9200	9300	112
49.2	9200	9300	113
49	9300	9400	114
50	9800	9700	115
49.8	8000	8000	116
49.6	9000	8850	118
49.4	9400	9100	119
50	9600	9500	120
49.8	8300	8150	121
49.6	8900	8800	122
49.4	9200	9100	123
50	9500	9500	125
50	8100	7800	126
50	8400	8250	127
50	8900	8700	128
50	8900	8700	129
50	9200	9050	130
50	9800	9500	132
50	9900	9750	133
50	10100	9950	134
50	7800	7600	135
50	6200	6550	136
50	6900	7150	137
50	7300	7650	139
50	8200	8300	140
50	8800	8900	141
50	9100	9150	142
50	8800	9000	143
50	9900	9750	147
50	10100	10050	149
50			150

## Sheet: Lyapunov (initial conditions) 
Final Volume (ml)	Cells per μl (F1)	Average cells/ul (N)	Final Volume (ml)	Cells per μl	Average cells/ul (N)	Δο	Δν	|Δν|	Δν/Δ0	ln(Δν/Δ0)	Lyapunov
24.8	20	20	24.8	209	209	189	189	189	1	0	0	1
24.6	20	20	24.6	209	209	189	189	189	1	0	0	2
24.4	20	20	24.4	209	209	189	189	189	1	0	0	3
24.2	20	20	24.2	209	209	189	189	189	1	0	0	4
24	20	20	24	209	209	189	189	189	1	0	0	5
23.8	20	20	23.8	209	209	189	189	189	1	0	0	6
23.6	20	20	23.6	209	209	189	189	189	1	0	0	7
23.4	20	20	23.4	209	204.5	189	184.5	184.5	0.97619	-0.0240976	-0.00301219	8
23.2	20	20	23.2	209	204.5	189	184.5	184.5	0.97619	-0.0240976	-0.00267751	9
23	20	20	23	200	200	189	180	180	0.952381	-0.0487902	-0.00487902	10
22.8	100	100	22.8	400	400	189	300	300	1.5873	0.462035	0.0420032	11
22.6	100	150	22.6	1000	1000	189	850	850	4.49735	1.50349	0.125291	12
22.4	400	400	22.4	4500	4600	189	4200	4200	22.2222	3.10109	0.238546	13
22.2	2500	2500	22.2	4600	4550	189	2050	2050	10.8466	2.38385	0.170275	14
24.8	3000	3050	24.8	3800	3850	189	800	800	4.2328	1.44286	0.096191	15
24.6	3200	3350	24.6	6900	6700	189	3350	3350	17.7249	2.87497	0.179686	16
24.4	6600	6350	24.4	9100	9100	189	2750	2750	14.5503	2.67761	0.157506	17
24.2	7900	8000	24.2	8900	8950	189	950	950	5.02646	1.61471	0.0897064	18
25	7800	7850	25	7300	7400	189	-450	450	2.38095	0.867501	0.0456579	19
24.8	6800	6800	24.8	9700	9200	189	2400	2400	12.6984	2.54148	0.127074	20
24.6	9000	8750	24.6	10500	10200	189	1450	1450	7.67196	2.03757	0.0970272	21
25	9700	9450	25	12500	11950	189	2500	2500	13.2275	2.5823	0.117377	22
24.8	11500	11900	24.8	11900	12150	189	250	250	1.32275	0.279714	0.0121615	23
24.6	12100	12050	24.6	12800	12950	189	900	900	4.7619	1.56065	0.065027	24
24.4	12800	12900	24.4	13000	13150	189	250	250	1.32275	0.279714	0.0111886	25
24.2	12900	13000	24.2	13300	13650	189	650	650	3.43915	1.23523	0.0475087	26
25	13700	13850	25	13600	13550	189	-300	300	1.5873	0.462035	0.0171124	27
24.8	13300	13450	24.8	14000	14000	189	550	550	2.91005	1.06817	0.038149	28
24.6	14000	14000	24.6	16500	16600	189	2600	2600	13.7566	2.62152	0.0903972	29
24.4	16800	16750	24.4	19000	19150	189	2400	2400	12.6984	2.54148	0.0847159	30
25	19200	19350	25	15200	15550	189	-3800	3800	20.1058	3.00101	0.0968068	31
24.8	15600	15650	24.8	16600	16900	189	1250	1250	6.61376	1.88915	0.059036	32
24.6	17700	17300	24.6	17200	17500	189	200	200	1.0582	0.0565704	0.00171425	33
24.4	18000	17850	24.4	18400	18350	189	500	500	2.6455	0.972861	0.0286136	34
25	18500	18450	25	15600	15600	189	-2850	2850	15.0794	2.71333	0.0775236	35
24.8	15900	16000	24.8	16500	16600	189	600	600	3.1746	1.15518	0.0320884	36
24.6	17500	17100	24.6	17600	17750	189	650	650	3.43915	1.23523	0.0333845	37
24.4	18200	18100	24.4	18600	18650	189	550	550	2.91005	1.06817	0.0281098	38
25	19800	19550	25	15800	16100	189	-3450	3450	18.254	2.90438	0.0744713	39
24.8	16700	16350	24.8	16700	16900	189	550	550	2.91005	1.06817	0.0267043	40
24.6	17100	16950	24.6	17200	17350	189	400	400	2.1164	0.749718	0.0182858	41
24.4	17500	17500	24.4	18400	18350	189	850	850	4.49735	1.50349	0.0357974	42
25	18900	18800	25	16200	16750	189	-2050	2050	10.8466	2.38385	0.0554383	43
24.8	17000	16600	24.8	16100	17000	189	400	400	2.1164	0.749718	0.017039	44
24.6	17300	17050	24.6	16800	17350	189	300	300	1.5873	0.462035	0.0102675	45
25	17500	17200	25	14300	14700	189	-2500	2500	13.2275	2.5823	0.0561369	46
24.8	15100	14950	24.8	14900	15300	189	350	350	1.85185	0.616186	0.0131103	47
24.6	15900	15750	24.6	17200	17450	189	1700	1700	8.99471	2.19664	0.0457633	48
25	18200	17350	25	14400	15100	189	-2250	2250	11.9048	2.47694	0.0505498	49
24.8	15000	14900	24.8	14600	14900	189	0	0	0	#NUM!	#NUM!	50
24.6	15300	15500	24.6	16200	16200	189	700	700	3.7037	1.30933	0.0256732	51
24.4	16200	16200	24.4	16100	16600	189	400	400	2.1164	0.749718	0.0144176	52

## Sheet: 20cells per ul_f1&f2&average
Day	Remaining Media Volume (ml) in Flask 1	Media Added (μl) in Flask 1	Final Volume of Media (ml) in Flask 1	Initial Number of Cells/μl (N0) Flask 1	Total Initial Number of Cells (N0-total)Flask 1	Cells/μl-Flask 1 (N-microscopy) (using microscopy)	Total Number of Cells Flask 1(N-total-microscopy) (using microscopy)	Initial Number of Cells/μl (N0) Flask 2	Total Initial Number of Cells (N0-total) Flask 2	Cells/μl-Flask 2 (N-microscopy) (using microscopy)	Total Number of Cells Flask 2 (N-total-microscopy) (using microscopy)	Average cells/ul Xo=20	Average total cells Xo=20	Total Cells (same volume)		cells/ul
-1	24.8	0	24.8	20	500000	20	500000	20	496000	20	496000	20	498000	500000		0
0	24.6	0	24.6	20	496000	20	496000	20	496000	20	496000	20	496000	500000		0
1	24.4	0	24.4	20	492000	20	492000	20	492000	20	492000	20	492000	500000		0
2	24.2	0	24.2	20	488000	20	488000	20	488000	20	488000	20	488000	500000		0
3	24	0	24	20	484000	20	484000	20	484000	20	484000	20	484000	500000		0
4	23.8	0	23.8	20	480000	20	480000	20	480000	20	480000	20	480000	500000		0
5	23.6	0	23.6	20	476000	20	476000	20	476000	20	476000	20	476000	500000		0
6	23.4	0	23.4	20	472000	20	472000	20	472000	20	472000	20	472000	500000		0
7	23.2	0	23.2	20	468000	20	468000	20	468000	20	468000	20	468000	500000		0
8	23	0	23	20	464000	20	464000	20	464000	20	464000	20	464000	500000		0
9	22.8	0	22.8	20	460000	100	2.3e+06	20	460000	100	2.3e+06	100	2.3e+06	2.5e+06		0
10	22.6	0	22.6	100	2.28e+06	100	2.28e+06	100	2.28e+06	200	4.56e+06	150	3.42e+06	3750000		25
11	22.4	0	22.4	100	2.26e+06	400	9.04e+06	200	4.52e+06	400	9.04e+06	400	9.04e+06	10000000		0
14	22.2	0	22.2	400	8.96e+06	2500	5.6e+07	400	8.96e+06	2500	5.6e+07	2500	5.6e+07	62500000		0
15	21	3800	24.8	2500	5.55e+07	3000	6.66e+07	2500	5.55e+07	3100	6.882e+07	3050	6.771e+07	76250000		25
16	24.6	0	24.6	2200	5.456e+07	3200	7.936e+07	2200	5.456e+07	3500	8.68e+07	3350	8.308e+07	8.375e+07		75
17	24.4	0	24.4	3200	7.872e+07	6600	1.6236e+08	3500	8.61e+07	6100	1.5006e+08	6350	1.5621e+08	1.5875e+08		125
20	24.2	0	24.2	6600	1.6104e+08	7900	1.9276e+08	6100	1.4884e+08	8100	1.9764e+08	8000	1.952e+08	2e+08		50
21	23	2000	25	7900	1.9118e+08	7800	1.8876e+08	8100	1.9602e+08	7900	1.9118e+08	7850	1.8997e+08	1.9625e+08		25
22	24.8	0	24.8	5500	1.375e+08	6800	1.7e+08	5700	1.425e+08	6800	1.7e+08	6800	1.7e+08	170000000		0
23	24.6	0	24.6	6800	1.6864e+08	9000	2.232e+08	6800	1.6864e+08	8500	2.108e+08	8750	2.17e+08	218750000		125
24	23.4	1600	25	9000	2.214e+08	9700	2.3862e+08	8500	2.091e+08	9200	2.2632e+08	9450	2.3247e+08	236250000		125
27	24.8	0	24.8	8000	2e+08	11500	2.875e+08	8100	2.025e+08	12300	3.075e+08	11900	2.975e+08	2.975e+08		200
28	24.6	0	24.6	11500	2.852e+08	12100	3.0008e+08	12300	3.0504e+08	12000	2.976e+08	12050	2.9884e+08	301250000		25
29	24.4	0	24.4	12100	2.9766e+08	12800	3.1488e+08	12000	2.952e+08	13000	3.198e+08	12900	3.1734e+08	322500000		50
30	24.2	0	24.2	12800	3.1232e+08	12900	3.1476e+08	13000	3.172e+08	13100	3.1964e+08	13000	3.172e+08	325000000		50
31	23	2000	25	12900	3.1218e+08	13700	3.3154e+08	13100	3.1702e+08	14000	3.388e+08	13850	3.3517e+08	346250000		75
34	24.8	0	24.8	11000	2.75e+08	13300	3.325e+08	10800	2.7e+08	13600	3.4e+08	13450	3.3625e+08	336250000		75
38	24.6	0	24.6	13300	3.2984e+08	14000	3.472e+08	13600	3.3728e+08	14000	3.472e+08	14000	3.472e+08	350000000		0
44	24.4	0	24.4	14000	3.444e+08	16800	4.1328e+08	14000	3.444e+08	16700	4.1082e+08	16750	4.1205e+08	4.1875e+08		25
52	23.2	1800	25	16800	4.0992e+08	19200	4.6848e+08	16700	4.0748e+08	19500	4.758e+08	19350	4.7214e+08	483750000		75
53	24.8	0	24.8	16200	4.05e+08	15600	3.9e+08	15300	3.825e+08	15700	3.925e+08	15650	3.9125e+08	3.9125e+08		25
55	24.6	0	24.6	15600	3.8688e+08	17700	4.3896e+08	15700	3.8936e+08	16900	4.1912e+08	17300	4.2904e+08	432500000		200
56	24.4	0	24.4	17700	4.3542e+08	18000	4.428e+08	16900	4.1574e+08	17700	4.3542e+08	17850	4.3911e+08	446250000		75
57	23.2	1800	25	18000	4.392e+08	18500	4.514e+08	17700	4.3188e+08	18400	4.4896e+08	18450	4.5018e+08	461250000		25
58	24.8	0	24.8	15400	3.85e+08	15900	3.975e+08	15300	3.825e+08	16100	4.025e+08	16000	4e+08	400000000		50
59	24.6	0	24.6	15900	3.9432e+08	17500	4.34e+08	16100	3.9928e+08	16700	4.1416e+08	17100	4.2408e+08	427500000		200
60	24.4	0	24.4	17500	4.305e+08	18200	4.4772e+08	16700	4.1082e+08	18000	4.428e+08	18100	4.4526e+08	452500000		50
62	23.2	1800	25	18200	4.4408e+08	19800	4.8312e+08	18000	4.392e+08	19300	4.7092e+08	19550	4.7702e+08	488750000		125
63	24.8	0	24.8	16400	4.1e+08	16700	4.175e+08	15700	3.925e+08	16000	4e+08	16350	4.0875e+08	408750000		175
64	24.6	0	24.6	16700	4.1416e+08	17100	4.2408e+08	16000	3.968e+08	16800	4.1664e+08	16950	4.2036e+08	423750000		75
65	24.4	0	24.4	17100	4.2066e+08	17500	4.305e+08	16800	4.1328e+08	17500	4.305e+08	17500	4.305e+08	437500000		0
66	23.2	1800	25	17500	4.27e+08	18900	4.6116e+08	17500	4.27e+08	18700	4.5628e+08	18800	4.5872e+08	470000000		50
69	24.8	0	24.8	14400	3.6e+08	17000	4.25e+08	13700	3.425e+08	16200	4.05e+08	16600	4.15e+08	415000000		200
70	24.6	0	24.6	17000	4.216e+08	17300	4.2904e+08	16200	4.0176e+08	16800	4.1664e+08	17050	4.2284e+08	426250000		125
71	23.4	1600	25	17300	4.2558e+08	17500	4.305e+08	16800	4.1328e+08	16900	4.1574e+08	17200	4.2312e+08	430000000		150
72	24.8	0	24.8	14600	3.65e+08	15100	3.775e+08	13300	3.325e+08	14800	3.7e+08	14950	3.7375e+08	373750000		75
73	24.6	0	24.6	15100	3.7448e+08	15900	3.9432e+08	14800	3.6704e+08	15600	3.8688e+08	15750	3.906e+08	3.9375e+08		75
76	23.4	1600	25	15900	3.9114e+08	18200	4.4772e+08	15600	3.8376e+08	16500	4.059e+08	17350	4.2681e+08	433750000		425
77	24.8	0	24.8	14900	3.725e+08	15000	3.75e+08	13900	3.475e+08	14800	3.7e+08	14900	3.725e+08	372500000		50
78	24.6	0	24.6	15000	3.72e+08	15300	3.7944e+08	14800	3.6704e+08	15700	3.8936e+08	15500	3.844e+08	387500000		100
79	24.4	0	24.4	15300	3.7638e+08	16200	3.9852e+08	15700	3.8622e+08	16200	3.9852e+08	16200	3.9852e+08	405000000		0
80	23.2	26800	50	16200	3.9528e+08	16600	4.0504e+08	16200	3.9528e+08	16500	4.026e+08	16550	4.0382e+08	4.1375e+08		25
85	49.8	0	49.8	8200	4.1e+08	9700	4.85e+08	8200	4.1e+08	9600	4.8e+08	9650	4.825e+08	482500000		25
86	49.6	0	49.6	9700	4.8306e+08	9900	4.9302e+08	9600	4.7808e+08	9900	4.9302e+08	9900	4.9302e+08	495000000		0
87	49.4	0	49.4	9900	4.9104e+08	9900	4.9104e+08	9900	4.9104e+08	10000	4.96e+08	9950	4.9352e+08	497500000		25
91	49.2	0	49.2	9900	4.8906e+08	10700	5.2858e+08	10000	4.94e+08	10700	5.2858e+08	10700	5.2858e+08	535000000		0
92	49	0	49	10700	5.2644e+08	11000	5.412e+08	10700	5.2644e+08	11100	5.4612e+08	11050	5.4366e+08	552500000		25
93	48.8	0	48.8	11000	5.39e+08	10900	5.341e+08	11100	5.439e+08	10900	5.341e+08	10900	5.341e+08	545000000		0
94	47.6	2400	50	10900	5.3192e+08	11300	5.5144e+08	10900	5.3192e+08	10900	5.3192e+08	11100	5.4168e+08	5.55e+08		100
95	49.8	0	49.8	7600	3.8e+08	7400	3.7e+08	7200	3.6e+08	7100	3.55e+08	7250	3.625e+08	3.625e+08		75
97	49.6	0	49.6	7400	3.6852e+08	8300	4.1334e+08	7100	3.5358e+08	8500	4.233e+08	8400	4.1832e+08	420000000		50
98	49.4	0	49.4	8300	4.1168e+08	8800	4.3648e+08	8500	4.216e+08	8600	4.2656e+08	8700	4.3152e+08	435000000		50
99	48.2	1800	50	8800	4.3472e+08	9000	4.446e+08	8600	4.2484e+08	8900	4.3966e+08	8950	4.4213e+08	447500000		25
100	49.8	0	49.8	7000	3.5e+08	7200	3.6e+08	6700	3.35e+08	7200	3.6e+08	7200	3.6e+08	360000000		0
101	49.6	0	49.6	7200	3.5856e+08	7800	3.8844e+08	7200	3.5856e+08	7700	3.8346e+08	7750	3.8595e+08	3.875e+08		25
103	49.4	0	49.4	7800	386880000	8700	431520000	7700	381920000	8300	411680000	8500	421600000	425000000		100
104	49.2	0	49.2	8700	429780000	8900	439660000	8300	410020000	8500	419900000	8700	429780000	435000000		100
105	49	0	49	8900	4.3788e+08	8900	4.3788e+08	8500	4.182e+08	8500	4.182e+08	8700	4.2804e+08	435000000		100
106	48.8	0	48.8	8900	4.361e+08	9100	4.459e+08	8500	4.165e+08	9000	4.41e+08	9050	4.4345e+08	452500000		25
107	48.6	0	48.6	9100	4.4408e+08	9400	4.5872e+08	9000	4.392e+08	9100	4.4408e+08	9250	4.514e+08	462500000		75
108	47.4	2600	50	9400	4.5684e+08	9700	4.7142e+08	9100	4.4226e+08	9500	4.617e+08	9600	4.6656e+08	480000000		50
109	49.8	0	49.8	7600	3.8e+08	7600	3.8e+08	7200	3.6e+08	7200	3.6e+08	7400	3.7e+08	370000000		100
111	49.6	0	49.6	7600	3.7848e+08	8700	4.3326e+08	7200	3.5856e+08	8200	4.0836e+08	8450	4.2081e+08	422500000		125
112	49.4	0	49.4	8700	4.3152e+08	8900	4.4144e+08	8200	4.0672e+08	8500	4.216e+08	8700	4.3152e+08	435000000		100
113	49.2	0	49.2	8900	4.3966e+08	9200	4.5448e+08	8500	4.199e+08	8500	4.199e+08	8850	4.3719e+08	442500000		175
114	49	0	49	9200	4.5264e+08	9300	4.5756e+08	8500	4.182e+08	8800	4.3296e+08	9050	4.4526e+08	452500000		125
115	47.8	2200	50	9300	4.557e+08	9400	4.606e+08	8800	4.312e+08	9300	4.557e+08	9350	4.5815e+08	467500000		25
116	49.8	0	49.8	7600	3.8e+08	8000	4e+08	7100	3.55e+08	7800	3.9e+08	7900	3.95e+08	395000000		50
118	49.6	0	49.6	8000	3.984e+08	8800	4.3824e+08	7800	3.8844e+08	8700	4.3326e+08	8750	4.3575e+08	437500000		25
119	49.4	0	49.4	8800	4.3648e+08	9200	4.5632e+08	8700	4.3152e+08	9100	4.5136e+08	9150	4.5384e+08	457500000		25
120	48.2	1800	50	9200	4.5448e+08	9500	4.693e+08	9100	4.4954e+08	9300	4.5942e+08	9400	4.6436e+08	470000000		50
121	49.8	0	49.8	7700	3.85e+08	8200	4.1e+08	7600	3.8e+08	7800	3.9e+08	8000	4e+08	400000000		100
122	49.6	0	49.6	8200	4.0836e+08	9200	4.5816e+08	7800	3.8844e+08	8800	4.3824e+08	9000	4.482e+08	450000000		100
123	49.4	0	49.4	9200	4.5632e+08	9200	4.5632e+08	8800	4.3648e+08	8900	4.4144e+08	9050	4.4888e+08	452500000		75
125	48.2	1800	50	9200	4.5448e+08	9900	4.8906e+08	8900	4.3966e+08	9600	4.7424e+08	9750	4.8165e+08	487500000		75
126	49.8	0	49.8	7200	3.6e+08	7700	3.85e+08	7600	3.8e+08	8200	4.1e+08	7950	3.975e+08	3.975e+08		125
127	49.6	0	49.6	7700	3.8346e+08	8500	4.233e+08	8200	4.0836e+08	8900	4.4322e+08	8700	4.3326e+08	435000000		100
128	49.4	0	49.4	8500	4.216e+08	8500	4.216e+08	8900	4.4144e+08	9200	4.5632e+08	8850	4.3896e+08	442500000		175
129	49.2	0	49.2	8500	4.199e+08	9100	4.4954e+08	9200	4.5448e+08	9300	4.5942e+08	9200	4.5448e+08	460000000		50
130	49	0	49	9100	4.4772e+08	9500	4.674e+08	9300	4.5756e+08	9600	4.7232e+08	9550	4.6986e+08	477500000		25
132	48.8	0	48.8	9500	4.655e+08	9900	4.851e+08	9600	4.704e+08	10000	4.9e+08	9950	4.8755e+08	497500000		25
133	48.6	0	48.6	9900	4.8312e+08	10100	4.9288e+08	10000	4.88e+08	10200	4.9776e+08	10150	4.9532e+08	507500000		25
134	48.4	0	48.4	10100	4.9086e+08	7600	3.6936e+08	10200	4.9572e+08	10600	5.1516e+08	9100	4.4226e+08	455000000		750
135	48.2	0	48.2	7600	3.6784e+08	7900	3.8236e+08	7700	3.7268e+08	7800	3.7752e+08	7850	3.7994e+08	3.925e+08		25
136	48	0	48	7900	3.8078e+08	6300	3.0366e+08	7800	3.7596e+08	6800	3.2776e+08	6550	3.1571e+08	327500000		125
137	47.8	0	47.8	6300	3.024e+08	6800	3.264e+08	6800	3.264e+08	7300	3.504e+08	7050	3.384e+08	352500000		125
139	47.6	0	47.6	6800	3.2504e+08	7500	3.585e+08	7300	3.4894e+08	7900	3.7762e+08	7700	3.6806e+08	3.85e+08		100
140	47.4	0	47.4	7500	3.57e+08	8000	3.808e+08	7900	3.7604e+08	8600	4.0936e+08	8300	3.9508e+08	4.15e+08		150
141	47.2	0	47.2	8000	3.792e+08	8700	4.1238e+08	8600	4.0764e+08	9000	4.266e+08	8850	4.1949e+08	442500000		75
142	47	0	47	8700	4.1064e+08	8800	4.1536e+08	9000	4.248e+08	9300	4.3896e+08	9050	4.2716e+08	452500000		125
143	46.8	0	46.8	8800	4.136e+08	8800	4.136e+08	9300	4.371e+08	9300	4.371e+08	9050	4.2535e+08	4.525e+08		125
146	46.6	0	46.6	8800	4.1184e+08	9500	4.446e+08	9300	4.3524e+08	10000	4.68e+08	9750	4.563e+08	4.875e+08		125
149	46.4	0	46.4	9500	4.427e+08	0	0	10000	4.66e+08	0	0	0	0	0
																					VALE AFTO ANTI TOY DIAGRAMMATOS ME TA BELAKIA

## Sheet: 200cells per ul_f1&f2&average
Day	Remaining Media Volume (ml) in Flask 1	Media Added (μl) in Flask 1	Final Volume of Media (ml) in Flask 1	Initial Number of Cells/μl (N0) Flask 1	Total Initial Number of Cells (N0-total)Flask 1	Cells/μl-Flask 1 (N-microscopy) (using microscopy)	Total Number of Cells Flask 1(N-total-microscopy) (using microscopy)	Initial Number of Cells/μl (N0) Flask 2	Total Initial Number of Cells (N0-total) Flask 2	Cells/μl-Flask 2 (N-microscopy) (using microscopy)	Total Number of Cells Flask 2 (N-total-microscopy) (using microscopy)	Average cells/ul Xo=209	Average total cells Xo=209	Total Cells (same volume)
-1	24.8	0	24.8	209	5183200	209	5183200	209	5183200	209	5183200	209	5183200	500000
0	24.6	0	24.6	209	5183200	209	5183200	209	5183200	209	5183200	209	5183200	5225000
1	24.4	0	24.4	209	5141400	209	5141400	209	5141400	209	5141400	209	5141400	5225000
2	24.2	0	24.2	209	5099600	209	5099600	209	5099600	209	5099600	209	5099600	5.225e+06
3	24	0	24	209	5.0578e+06	209	5.0578e+06	209	5.0578e+06	209	5.0578e+06	209	5.0578e+06	5225000
4	23.8	0	23.8	209	5.016e+06	209	5.016e+06	209	5.016e+06	209	5.016e+06	209	5.016e+06	5225000
5	23.6	0	23.6	209	4.9742e+06	209	4.9742e+06	209	4.9742e+06	209	4.9742e+06	209	4.9742e+06	5225000
6	23.4	0	23.4	209	4.9324e+06	209	4.9324e+06	209	4.9324e+06	200	4.72e+06	204.5	4.8262e+06	5112500
7	23.2	0	23.2	209	4.8906e+06	209	4.8906e+06	200	4.68e+06	200	4.68e+06	204.5	4.7853e+06	5112500
8	23	0	23	209	4.8488e+06	200	4.64e+06	200	4.64e+06	200	4.64e+06	200	4.64e+06	5e+06
10	22.8	0	22.8	200	4.6e+06	400	9.2e+06	200	4.6e+06	400	9.2e+06	400	9.2e+06	1e+07
11	22.6	0	22.6	400	9.12e+06	1000	2.28e+07	400	9.12e+06	1000	2.28e+07	1000	2.28e+07	25000000
14	22.4	0	22.4	1000	2.26e+07	4500	1.017e+08	1000	2.26e+07	4700	1.0622e+08	4600	1.0396e+08	115000000
15	22.2	0	22.2	4500	1.008e+08	4600	1.0304e+08	4700	1.0528e+08	4500	1.008e+08	4550	1.0192e+08	113750000
16	21	3800	24.8	3300	7.326e+07	3800	8.436e+07	3300	7.326e+07	3900	8.658e+07	3850	8.547e+07	9.625e+07
17	24.6	0	24.6	3217.74	7.98e+07	6900	1.7112e+08	3302.42	8.19e+07	6500	1.612e+08	6700	1.6616e+08	1.675e+08
20	24.4	0	24.4	6900	1.6974e+08	9100	2.2386e+08	6500	1.599e+08	9100	2.2386e+08	9100	2.2386e+08	227500000
21	24.2	0	24.2	9100	2.2204e+08	8900	2.1716e+08	9100	2.2204e+08	9000	2.196e+08	8950	2.1838e+08	223750000
22	23	2000	25	6500	1.573e+08	7300	1.7666e+08	6600	1.5972e+08	7500	1.815e+08	7400	1.7908e+08	185000000
23	24.8	0	24.8	6716	1.679e+08	9700	2.425e+08	6900	1.725e+08	8700	2.175e+08	9200	2.3e+08	230000000
24	24.6	0	24.6	9700	2.4056e+08	10500	2.604e+08	8700	2.1576e+08	9900	2.4552e+08	10200	2.5296e+08	255000000
27	23.4	1600	25	7900	1.9434e+08	12500	3.075e+08	820	2.0172e+07	11400	2.8044e+08	11950	2.9397e+08	298750000
28	24.8	0	24.8	11700	2.925e+08	11900	2.975e+08	10670.4	2.6676e+08	12400	3.1e+08	12150	3.0375e+08	303750000
29	24.6	0	24.6	11900	2.9512e+08	12800	3.1744e+08	12400	3.0752e+08	13100	3.2488e+08	12950	3.2116e+08	323750000
30	24.4	0	24.4	12800	3.1488e+08	13000	3.198e+08	13100	3.2226e+08	13300	3.2718e+08	13150	3.2349e+08	328750000
31	24.2	0	24.2	13000	3.172e+08	13300	3.2452e+08	13300	3.2452e+08	14000	3.416e+08	13650	3.3306e+08	3.4125e+08
34	23	2000	25	11000	2.662e+08	13600	3.2912e+08	10800	2.6136e+08	13500	3.267e+08	13550	3.2791e+08	338750000
38	24.8	0	24.8	12512	3.128e+08	14000	3.5e+08	12420	3.105e+08	14000	3.5e+08	14000	3.5e+08	350000000
44	24.6	0	24.6	14000	3.472e+08	16500	4.092e+08	14000	3.472e+08	16700	4.1416e+08	16600	4.1168e+08	415000000
52	24.4	0	24.4	16500	4.059e+08	19000	4.674e+08	16700	4.1082e+08	19300	4.7478e+08	19150	4.7109e+08	478750000
53	23.2	1800	25	15200	3.7088e+08	15200	3.7088e+08	15900	3.8796e+08	15900	3.8796e+08	15550	3.7942e+08	388750000
55	24.8	0	24.8	14105.6	3.5264e+08	16600	4.15e+08	14755.2	3.6888e+08	17200	4.3e+08	16900	4.225e+08	422500000
56	24.6	0	24.6	16600	4.1168e+08	17200	4.2656e+08	17200	4.2656e+08	17800	4.4144e+08	17500	4.34e+08	437500000
57	24.4	0	24.4	17200	4.2312e+08	18400	4.5264e+08	17800	4.3788e+08	18300	4.5018e+08	18350	4.5141e+08	458750000
58	23.2	1800	25	14700	3.5868e+08	15600	3.8064e+08	15500	3.782e+08	15600	3.8064e+08	15600	3.8064e+08	390000000
59	24.8	0	24.8	14476.8	3.6192e+08	16500	4.125e+08	14476.8	3.6192e+08	16700	4.175e+08	16600	4.15e+08	415000000
60	24.6	0	24.6	16500	4.092e+08	17600	4.3648e+08	16700	4.1416e+08	17900	4.4392e+08	17750	4.402e+08	443750000
62	24.4	0	24.4	17600	4.3296e+08	18600	4.5756e+08	17900	4.4034e+08	18700	4.6002e+08	18650	4.5879e+08	466250000
63	23.2	1800	25	15100	3.6844e+08	15800	3.8552e+08	15800	3.8552e+08	16400	4.0016e+08	16100	3.9284e+08	402500000
64	24.8	0	24.8	14662.4	3.6656e+08	16700	4.175e+08	15219.2	3.8048e+08	17100	4.275e+08	16900	4.225e+08	422500000
65	24.6	0	24.6	16700	4.1416e+08	17200	4.2656e+08	17100	4.2408e+08	17500	4.34e+08	17350	4.3028e+08	433750000
66	24.4	0	24.4	17200	4.2312e+08	18400	4.5264e+08	17500	4.305e+08	18300	4.5018e+08	18350	4.5141e+08	458750000
69	23.2	1800	25	13400	3.2696e+08	16200	3.9528e+08	14600	3.5624e+08	17300	4.2212e+08	16750	4.087e+08	4.1875e+08
70	24.8	0	24.8	15033.6	3.7584e+08	16100	4.025e+08	16054.4	4.0136e+08	17900	4.475e+08	17000	4.25e+08	425000000
71	24.6	0	24.6	16100	3.9928e+08	16800	4.1664e+08	17900	4.4392e+08	17900	4.4392e+08	17350	4.3028e+08	433750000
72	23.4	1600	25	13200	3.2472e+08	14300	3.5178e+08	13900	3.4194e+08	15100	3.7146e+08	14700	3.6162e+08	367500000
73	24.8	0	24.8	13384.8	3.3462e+08	14900	3.725e+08	14133.6	3.5334e+08	15700	3.925e+08	15300	3.825e+08	382500000
76	24.6	0	24.6	14900	3.6952e+08	17200	4.2656e+08	15700	3.8936e+08	17700	4.3896e+08	17450	4.3276e+08	436250000
77	23.4	1600	25	13500	3.321e+08	14400	3.5424e+08	14900	3.6654e+08	15800	3.8868e+08	15100	3.7146e+08	377500000
78	24.8	0	24.8	13478.4	3.3696e+08	14600	3.65e+08	14788.8	3.6972e+08	15200	3.8e+08	14900	3.725e+08	3.725e+08
79	24.6	0	24.6	14600	3.6208e+08	16200	4.0176e+08	15200	3.7696e+08	16200	4.0176e+08	16200	4.0176e+08	405000000
80	24.4	0	24.4	16200	3.9852e+08	16100	3.9606e+08	16200	3.9852e+08	17100	4.2066e+08	16600	4.0836e+08	415000000
85	23.2	26800	50	7800	1.9032e+08	9500	2.318e+08	8500	2.074e+08	9700	2.3668e+08	9600	2.3424e+08	480000000
86	49.8	0	49.8	4408	2.204e+08	9600	4.8e+08	4500.8	2.2504e+08	10300	5.15e+08	9950	4.975e+08	497500000
87	49.6	0	49.6	9600	4.7808e+08	9800	4.8804e+08	10300	5.1294e+08	10100	5.0298e+08	9950	4.9551e+08	497500000
91	49.4	0	49.4	9800	4.8608e+08	10900	5.4064e+08	3700	1.8352e+08	11400	5.6544e+08	11150	5.5304e+08	5.575e+08
92	49.2	0	49.2	10900	5.3846e+08	11100	5.4834e+08	11400	5.6316e+08	11300	5.5822e+08	11200	5.5328e+08	560000000
93	49	0	49	11100	5.4612e+08	10900	5.3628e+08	11300	5.5596e+08	10900	5.3628e+08	10900	5.3628e+08	545000000
94	47.8	2200	50	10900	5.341e+08	11000	5.39e+08	10900	5.341e+08	11600	5.684e+08	11300	5.537e+08	565000000
95	49.8	0	49.8	7300	3.65e+08	7400	3.7e+08	7400	3.7e+08	7500	3.75e+08	7450	3.725e+08	3.725e+08
97	49.6	0	49.6	7400	3.6852e+08	8500	4.233e+08	7500	3.735e+08	8800	4.3824e+08	8650	4.3077e+08	432500000
98	49.4	0	49.4	8500	4.216e+08	8900	4.4144e+08	8800	4.3648e+08	9100	4.5136e+08	9000	4.464e+08	450000000
99	48.2	1800	50	8900	4.3966e+08	9300	4.5942e+08	9100	4.4954e+08	9300	4.5942e+08	9300	4.5942e+08	465000000
100	49.8	0	49.8	6800	3.4e+08	7200	3.6e+08	7100	3.55e+08	7500	3.75e+08	7350	3.675e+08	367500000
101	49.6	0	49.6	7200	3.5856e+08	7800	3.8844e+08	7500	3.735e+08	7500	3.735e+08	7650	3.8097e+08	3.825e+08
103	49.4	0	49.4	7800	3.8688e+08	8700	4.3152e+08	7500	3.72e+08	8700	4.3152e+08	8700	4.3152e+08	435000000
104	49.2	0	49.2	8700	4.2978e+08	8800	4.3472e+08	8700	4.2978e+08	8900	4.3966e+08	8850	4.3719e+08	442500000
105	49	0	49	8800	432960000	8800	432960000	8900	437880000	9000	442800000	8900	437880000	445000000
106	48.8	0	48.8	8800	431200000	9000	441000000	9000	441000000	9100	445900000	9050	443450000	452500000
107	48.6	0	48.6	9000	439200000	9600	468480000	9100	444080000	9300	453840000	9450	461160000	472500000
108	47.4	2600	50	9600	4.6656e+08	9700	4.7142e+08	9300	4.5198e+08	9800	4.7628e+08	9750	4.7385e+08	487500000
109	49.8	0	49.8	7700	3.85e+08	7800	3.9e+08	7600	3.8e+08	7700	3.85e+08	7750	3.875e+08	387500000
111	49.6	0	49.6	7800	3.8844e+08	8600	4.2828e+08	7700	3.8346e+08	8500	4.233e+08	8550	4.2579e+08	427500000
112	49.4	0	49.4	8600	4.2656e+08	9200	4.5632e+08	8500	4.216e+08	9400	4.6624e+08	9300	4.6128e+08	465000000
113	49.2	0	49.2	9200	4.5448e+08	9200	4.5448e+08	9400	4.6436e+08	9400	4.6436e+08	9300	4.5942e+08	465000000
114	49	0	49	9200	4.5264e+08	9300	4.5756e+08	9400	4.6248e+08	9500	4.674e+08	9400	4.6248e+08	470000000
115	47.8	2200	50	9300	4.557e+08	9800	4.802e+08	9500	4.655e+08	9600	4.704e+08	9700	4.753e+08	485000000
116	49.8	0	49.8	7500	3.75e+08	8000	4e+08	7600	3.8e+08	8000	4e+08	8000	4e+08	400000000
118	49.6	0	49.6	8000	3.984e+08	9000	4.482e+08	8000	3.984e+08	8700	4.3326e+08	8850	4.4073e+08	442500000
119	49.4	0	49.4	9000	4.464e+08	9400	4.6624e+08	8700	4.3152e+08	8800	4.3648e+08	9100	4.5136e+08	455000000
120	48.2	1800	50	9400	4.6436e+08	9600	4.7424e+08	8800	4.3472e+08	9400	4.6436e+08	9500	4.693e+08	475000000
121	49.8	0	49.8	7700	3.85e+08	8300	4.15e+08	7800	3.9e+08	8000	4e+08	8150	4.075e+08	407500000
122	49.6	0	49.6	8300	4.1334e+08	8900	4.4322e+08	8000	3.984e+08	8700	4.3326e+08	8800	4.3824e+08	440000000
123	49.4	0	49.4	8900	4.4144e+08	9200	4.5632e+08	8700	4.3152e+08	9000	4.464e+08	9100	4.5136e+08	455000000
125	48.2	1800	50	9200	4.5448e+08	9500	4.693e+08	9000	4.446e+08	9500	4.693e+08	9500	4.693e+08	475000000
126	49.8	0	49.8	7300	3.65e+08	8100	4.05e+08	7100	3.55e+08	7500	3.75e+08	7800	3.9e+08	3.9e+08
127	49.6	0	49.6	8100	4.05e+08	8400	4.2e+08	7500	3.735e+08	8100	4.0338e+08	8250	4.1169e+08	4.13343e+08
128	49.4	0	49.4	8400	4.2e+08	8900	4.45e+08	8100	4.0176e+08	8500	4.216e+08	8700	4.333e+08	4.36794e+08
129	49.2	0	49.2	8900	4.45e+08	8900	4.45e+08	8500	4.199e+08	8500	4.199e+08	8700	4.3245e+08	4.37702e+08
130	49	0	49	8900	4.45e+08	9200	4.6e+08	8500	4.182e+08	8900	4.3788e+08	9050	4.4894e+08	4.5624e+08
132	48.8	0	48.8	9200	4.6e+08	9800	4.9e+08	8900	4.361e+08	9200	4.508e+08	9500	4.704e+08	4.8e+08
133	48.6	0	48.6	9800	4.9e+08	9900	4.95e+08	9200	4.4896e+08	9600	4.6848e+08	9750	4.8174e+08	4.93586e+08
134	48.4	0	48.4	9900	4.95e+08	10100	5.05e+08	9600	4.6656e+08	9800	4.7628e+08	9950	4.9064e+08	5.04774e+08
135	48.2	0	48.2	7600	3.8e+08	7800	3.9e+08	9800	4.7432e+08	7400	3.5816e+08	7600	3.7408e+08	3.86446e+08
136	48	0	48	7800	3.9e+08	6200	3.1e+08	7400	3.5816e+08	6900	3.3396e+08	6550	3.2198e+08	3.34004e+08
137	47.8	0	47.8	6200	3.1e+08	6900	3.45e+08	6900	3.3396e+08	7400	3.5816e+08	7150	3.5158e+08	3.66229e+08
139	47.6	0	47.6	6900	3.45e+08	7300	3.65e+08	7400	3.5816e+08	8000	3.872e+08	7650	3.761e+08	3.9341e+08
140	47.4	0	47.4	7300	3.65e+08	8200	4.1e+08	8000	3.872e+08	8400	4.0656e+08	8300	4.0828e+08	4.28866e+08
141	47.2	0	47.2	8200	4.1e+08	8800	4.4e+08	8400	4.0656e+08	9000	4.356e+08	8900	4.378e+08	4.61814e+08
142	47	0	47	8800	4.4e+08	9100	4.55e+08	9000	4.356e+08	9200	4.4528e+08	9150	4.5014e+08	4.76843e+08
143	46.8	0	46.8	9100	4.55e+08	8800	4.4e+08	9200	4.4528e+08	9200	4.4528e+08	9000	4.4264e+08	4.70894e+08
147	46.6	0	46.6	8800	4.4e+08	9900	4.95e+08	9200	4.4528e+08	9600	4.6464e+08	9750	4.7982e+08	5.12628e+08
149	46.4	0	46.4	9900	4.95e+08	10100	5.05e+08	9600	4.6464e+08	10000	4.84e+08	10050	4.945e+08	5.30579e+08
150	46.2	0	46.2	10100	5.05e+08	0	0	10000	4.84e+08	0	0	0	0	0

## Sheet: EXPI & II
Day	Remaining Media Volume (ml) in Flask 1	Media Added (μl) in Flask 1	Final Volume of Media (ml) in Flask 1	EXP I Initial Number of Cells/μl (N0) Flask 1	Total Initial Number of Cells (N0-total)Flask 1	Cells/μl-Flask 1 (N-microscopy) (using microscopy)	Total Number of Cells Flask 1(N-total-microscopy) (using microscopy)	EXP II Initial Number of Cells/μl (N0) Flask 2	Total Initial Number of Cells (N0-total) Flask 2	Cells/μl-Flask 2 (N-microscopy) (using microscopy)	Total Number of Cells Flask 2 (N-total-microscopy) (using microscopy)
-1	24.8	0	24.8	20	496000	20	496000	196	4860800	196	4860800
0	24.6	0	24.6	20	496000	20	496000	196	4860800	196	4860800
1	24.4	0	24.4	20	492000	20	492000	196	4821600	196	4821600
2	24.2	0	24.2	20	488000	20	488000	196	4782400	196	4782400
3	24	0	24	20	484000	20	484000	196	4.7432e+06	196	4.7432e+06
4	23.8	0	23.8	20	480000	20	480000	196	4.704e+06	100	2.4e+06
5	23.6	0	23.6	20	476000	20	476000	100	2.38e+06	100	2.38e+06
6	23.4	0	23.4	20	472000	20	472000	100	2.36e+06	100	2.36e+06
7	23.2	0	23.2	20	468000	20	468000	100	2.34e+06	100	2.34e+06
8	22	0	22	20	464000	20	464000	100	2.32e+06	200	4.64e+06
9	21.8	0	21.8	20	440000	20	440000	200	4.4e+06	300	6.6e+06
10	21.6	0	21.6	20	436000	20	436000	300	6.54e+06	300	6.54e+06
12	21.4	0	21.4	20	432000	100	2.16e+06	300	6.48e+06	800	1.728e+07
13	21.2	0	21.2	100	2.14e+06	100	2.14e+06	800	1.712e+07	1000	2.14e+07
14	21	0	21	100	2.12e+06	100	2.12e+06	1000	2.12e+07	1100	2.332e+07
15	20.8	0	20.8	100	2.1e+06	200	4.2e+06	1100	2.31e+07	1400	2.94e+07
17	20.6	0	20.6	200	4.16e+06	500	1.04e+07	1400	2.912e+07	1600	3.328e+07
18	20.4	0	20.4	500	1.03e+07	700	1.442e+07	1600	3.296e+07	1600	3.296e+07
19	20.2	0	20.2	700	1.428e+07	900	1.836e+07	1600	3.264e+07	1600	3.264e+07
20	20	0	20	900	1.818e+07	900	1.818e+07	1600	3.232e+07	1700	3.434e+07
21	19.8	0	19.8	900	1.8e+07	1000	2e+07	1700	3.4e+07	1900	3.8e+07
22	18.1	0	18.1	1000	1.98e+07	1100	2.178e+07	1900	3.762e+07	2200	4.356e+07
23	17.9	0	17.9	1100	1.991e+07	1200	2.172e+07	2200	3.982e+07	2300	4.163e+07
24	17.7	0	17.7	1200	2.148e+07	1200	2.148e+07	2300	4.117e+07	2300	4.117e+07
25	17.5	0	17.5	1200	2.124e+07	1300	2.301e+07	2300	4.071e+07	2300	4.071e+07
26	17.3	0	17.3	1300	2.275e+07	1320	2.31e+07	2300	4.025e+07	2300	4.025e+07
27	17.1	0	17.1	1320	2.2836e+07	1410	2.4393e+07	2300	3.979e+07	2300	3.979e+07
28	16.9	0	16.9	1410	2.4111e+07	1420	2.4282e+07	2300	3.933e+07	2310	3.9501e+07
29	16.7	0	16.7	1420	2.3998e+07	1470	2.4843e+07	2310	3.9039e+07	2200	3.718e+07
33	16.5	0	16.5	1470	2.4549e+07	1450	2.4215e+07	2200	3.674e+07	2500	4.175e+07
36	16.3	0	16.3	1450	2.3925e+07	1490	2.4585e+07	2500	4.125e+07	2290	3.7785e+07
41	16.1	0	16.1	1490	2.4287e+07	1600	2.608e+07	2290	3.7327e+07	2600	4.238e+07
42	15.9	9100	25	1600	2.576e+07	1600	2.576e+07	2600	4.186e+07	2700	4.347e+07
43	24.8	0	24.8	1017.6	2.544e+07	760	1.9e+07	1717.2	4.293e+07	1100	2.75e+07
44	24.6	0	24.6	760	1.8848e+07	760	1.8848e+07	1100	2.728e+07	1190	2.9512e+07
47	24.4	0	24.4	760	1.8696e+07	840	2.0664e+07	1190	2.9274e+07	1190	2.9274e+07
48	24.2	0	24.2	840	2.0496e+07	900	2.196e+07	1190	2.9036e+07	1260	3.0744e+07
49	24	0	24	900	2.178e+07	800	1.936e+07	1260	3.0492e+07	1220	2.9524e+07
51	23.8	0	23.8	800	1.92e+07	900	2.16e+07	1220	2.928e+07	1200	2.88e+07
54	23.6	0	23.6	900	2.142e+07	900	2.142e+07	1200	2.856e+07	1400	3.332e+07
56	23.4	0	23.4	900	2.124e+07	900	2.124e+07	1400	3.304e+07	1400	3.304e+07
57	23.2	0	23.2	900	2.106e+07	900	2.106e+07	1400	3.276e+07	1500	3.51e+07
58	23	0	23	900	2.088e+07	1000	2.32e+07	1500	3.48e+07	1400	3.248e+07
61	22.8	2200	25	1000	2.3e+07	1000	2.3e+07	1400	3.22e+07	1400	3.22e+07
62	24.8	0	24.8	912	2.28e+07	1000	2.5e+07	1276.8	3.192e+07	1500	3.75e+07
63	24.6	0	24.6	1000	2.48e+07	1200	2.976e+07	1500	3.72e+07	1600	3.968e+07
65	24.4	600	25	1200	2.952e+07	1700	4.182e+07	1600	3.936e+07	2000	4.92e+07
66	24.8	0	24.8	900	2.25e+07	1000	2.5e+07	1000	2.5e+07	1400	3.5e+07
68	23.6	0	23.6	1000	2.48e+07	2800	6.944e+07	1400	3.472e+07	2700	6.696e+07
69	23.4	0	23.4	2800	6.608e+07	4700	1.1092e+08	2700	6.372e+07	4200	9.912e+07
70	23.2	0	23.2	4700	1.0998e+08	5300	1.2402e+08	4200	9.828e+07	5000	1.17e+08
71	23	0	23	5300	1.2296e+08	6000	1.392e+08	5000	1.16e+08	5200	1.2064e+08
72	22.8	0	22.8	6000	1.38e+08	6000	1.38e+08	5200	1.196e+08	5300	1.219e+08
73	22.6	0	22.6	6000	1.368e+08	6700	1.5276e+08	5300	1.2084e+08	5400	1.2312e+08
75	22.4	2600	25	6700	1.5142e+08	7300	1.6498e+08	5400	1.2204e+08	5800	1.3108e+08
76	23.3	0	23.3	4400	1.1e+08	5400	1.35e+08	3700	8.288e+07	4400	9.856e+07
77	23.1	0	23.1	5400	1.2582e+08	9200	2.1436e+08	4400	9.108e+07	6900	1.4283e+08
78	21.4	0	21.4	9200	2.1252e+08	9200	2.1252e+08	6900	1.4145e+08	6800	1.394e+08
79	21.2	3800	25	9200	1.9688e+08	9300	1.9902e+08	6800	1.2784e+08	8000	1.504e+08
80	24.8	0	24.8	8400	2.1e+08	11100	2.775e+08	7100	1.775e+08	10200	2.55e+08
81	24.6	0	24.6	11100	2.7528e+08	13400	3.3232e+08	10200	2.5296e+08	11500	2.852e+08
82	24.4	0	24.4	13400	3.2964e+08	13500	3.321e+08	11500	2.829e+08	11800	2.9028e+08
83	22.7	0	22.7	13500	3.294e+08	14100	3.4404e+08	11800	2.8792e+08	12300	3.0012e+08
84	22.5	0	22.5	14100	3.2007e+08	16100	3.6547e+08	12300	2.7921e+08	12900	2.9283e+08
85	20.3	0	20.3	16100	3.6225e+08	15700	3.5325e+08	12900	2.9025e+08	13400	3.015e+08
86	20.1	4900	25	15700	3.1871e+08	16000	3.248e+08	13400	2.7202e+08	14000	2.842e+08
89	24.8	0	24.8	9900	2.475e+08	15400	3.85e+08	8700	2.175e+08	14400	3.6e+08
90	22.6	0	22.6	15400	3.8192e+08	16200	4.0176e+08	14400	3.5712e+08	15400	3.8192e+08
91	22.4	0	22.4	16200	3.6612e+08	16800	3.7968e+08	15400	3.4804e+08	15600	3.5256e+08
92	20.7	0	20.7	16800	3.7632e+08	16800	3.7632e+08	15600	3.4944e+08	16800	3.7632e+08
94	20.5	0	20.5	16800	3.4776e+08	16400	3.3948e+08	16800	3.4776e+08	16200	3.3534e+08
96	20.3	0	20.3	14300	2.9315e+08	18700	3.8335e+08	13400	2.747e+08	18300	3.7515e+08
97	20.1	0	20.1	18700	3.7961e+08	18900	3.8367e+08	18300	3.7149e+08	19300	3.9179e+08
98	19.9	0	19.9	18900	3.7989e+08	19600	3.9396e+08	19300	3.8793e+08	20300	4.0803e+08
99	19.7	0	19.7	19600	3.9004e+08	20100	3.9999e+08	20300	4.0397e+08	20300	4.0397e+08
100	19.5	5500	25	20100	3.9597e+08	20100	3.9597e+08	20300	3.9991e+08	20600	4.0582e+08
101	24.8	0	24.8	13500	3.375e+08	14800	3.7e+08	14200	3.55e+08	14900	3.725e+08
103	24.6	0	24.6	14800	3.6704e+08	17600	4.3648e+08	14900	3.6952e+08	18500	4.588e+08
105	24.4	0	24.4	17600	4.3296e+08	19100	4.6986e+08	18500	4.551e+08	20100	4.9446e+08
106	24.2	0	24.2	19100	4.6604e+08	19600	4.7824e+08	20100	4.9044e+08	20800	5.0752e+08
107	24	1000	25	19600	4.7432e+08	19300	4.6706e+08	20800	5.0336e+08	20800	5.0336e+08
108	24.8	0	24.8	19100	4.775e+08	19700	4.925e+08	18900	4.725e+08	19900	4.975e+08
110	24.6	0	24.6	19700	4.8856e+08	24100	5.9768e+08	19900	4.9352e+08	24900	6.1752e+08
111	21.4	0	21.4	24100	5.9286e+08	24700	6.0762e+08	24900	6.1254e+08	26100	6.4206e+08
113	21.2	0	21.2	24700	5.2858e+08	25500	5.457e+08	26100	5.5854e+08	25600	5.4784e+08
113	20.5	0	20.5	25500	5.406e+08	25800	5.4696e+08	25600	5.2992e+08	25500	5.2785e+08
118	20.3	0	20.3	25800	5.289e+08	29000	5.945e+08	25500	5.2275e+08	28600	5.863e+08
122	20.1	0	20.1	29000	5.887e+08	30000	6.09e+08	28600	5.8058e+08	29400	5.9682e+08
124	19.9	0	19.9	30000	6.03e+08	29300	5.8893e+08	29400	5.9094e+08	28300	5.6883e+08
131	19.7	0	19.7	29300	5.8307e+08	29500	5.8705e+08	28300	5.6317e+08	26900	5.3531e+08
134	17.5	0	17.5	29500	5.8115e+08	31600	6.2252e+08	26900	5.2993e+08	31500	6.2055e+08
138	17.3	0	17.3	31600	5.53e+08	32600	5.705e+08	31500	5.5125e+08	31600	5.53e+08
141	15.6	0	15.6	32600	5.6398e+08	36400	6.2972e+08	31600	5.4668e+08	32200	5.5706e+08

## Sheet: LYAPUNOV_ per ul
Average cells/ul Xo=20	Average per MAX Xo=20	Average cells/ul Xo=209	Average per Max Xo=209	Δν cells per ul	Δν Percentage cells	|Δν/Δο|	ln |Δν/Δο|	LYAPUNOV/Ν
20	0.00102302	209	0.0106905	189	0.00966752	1	0		1
20	0.00102302	209	0.0106905	189	0.00966752	1	0		2
20	0.00102302	209	0.0106905	189	0.00966752	1	0		3
20	0.00102302	209	0.0106905	189	0.00966752	1	0		4
20	0.00102302	209	0.0106905	189	0.00966752	1	0		5
20	0.00102302	209	0.0106905	189	0.00966752	1	0		6
20	0.00102302	209	0.0106905	189	0.00966752	1	0		7
20	0.00102302	204.5	0.0104604	184.5	0.00943734	0.97619	-0.0240976		8
20	0.00102302	204.5	0.0104604	184.5	0.00943734	0.97619	-0.0240976		9
20	0.00102302	200	0.0102302	180	0.00920716	0.952381	-0.0487902		10
100	0.00511509	400	0.0204604	300	0.0153453	1.5873	0.462035		11
150	0.00767263	1000	0.0511509	850	0.0434783	4.49735	1.50349		12
400	0.0204604	4600	0.235294	4200	0.214834	22.2222	3.10109		13
2500	0.127877	4550	0.232737	2050	0.104859	10.8466	2.38385		14
3050	0.15601	3850	0.196931	800	0.0409207	4.2328	1.44286		15
3350	0.171355	6700	0.342711	3350	0.171355	17.7249	2.87497		16
6350	0.324808	9100	0.465473	2750	0.140665	14.5503	2.67761		17
8000	0.409207	8950	0.457801	950	0.0485934	5.02646	1.61471		18
7850	0.401535	7400	0.378517	-450	-0.0230179	2.38095	0.867501		19
6800	0.347826	9200	0.470588	2400	0.122762	12.6984	2.54148		20
8750	0.44757	10200	0.521739	1450	0.0741688	7.67196	2.03757		21
9450	0.483376	11950	0.611253	2500	0.127877	13.2275	2.5823		22
11900	0.608696	12150	0.621483	250	0.0127877	1.32275	0.279714		23
12050	0.616368	12950	0.662404	900	0.0460358	4.7619	1.56065		24
12900	0.659847	13150	0.672634	250	0.0127877	1.32275	0.279714		25
13000	0.664962	13650	0.69821	650	0.0332481	3.43915	1.23523		26
13850	0.70844	13550	0.693095	-300	-0.0153453	1.5873	0.462035		27
13450	0.68798	14000	0.716113	550	0.028133	2.91005	1.06817		28
14000	0.716113	16600	0.849105	2600	0.132992	13.7566	2.62152		29
16750	0.856777	19150	0.97954	2400	0.122762	12.6984	2.54148		30
19350	0.98977	15550	0.795396	-3800	-0.194373	20.1058	3.00101		31
15650	0.800512	16900	0.86445	1250	0.0639386	6.61376	1.88915		32
17300	0.88491	17500	0.895141	200	0.0102302	1.0582	0.0565704		33
17850	0.913043	18350	0.938619	500	0.0255754	2.6455	0.972861		34
18450	0.943734	15600	0.797954	-2850	-0.14578	15.0794	2.71333		35
16000	0.818414	16600	0.849105	600	0.0306905	3.1746	1.15518		36
17100	0.87468	17750	0.907928	650	0.0332481	3.43915	1.23523		37
18100	0.925831	18650	0.953964	550	0.028133	2.91005	1.06817		38
19550	1	16100	0.823529	-3450	-0.176471	18.254	2.90438		39
16350	0.836317	16900	0.86445	550	0.028133	2.91005	1.06817		40
16950	0.867008	17350	0.887468	400	0.0204604	2.1164	0.749718		41
17500	0.895141	18350	0.938619	850	0.0434783	4.49735	1.50349		42
18800	0.961637	16750	0.856777	-2050	-0.104859	10.8466	2.38385		43
16600	0.849105	17000	0.869565	400	0.0204604	2.1164	0.749718		44
17050	0.872123	17350	0.887468	300	0.0153453	1.5873	0.462035		45
17200	0.879795	14700	0.751918	-2500	-0.127877	13.2275	2.5823		46
14950	0.764706	15300	0.782609	350	0.0179028	1.85185	0.616186		47
15750	0.805627	17450	0.892583	1700	0.0869565	8.99471	2.19664		48
17350	0.887468	15100	0.772379	-2250	-0.11509	11.9048	2.47694		49
14900	0.762148	14900	0.762148	0	0	0	#NUM!		50
15500	0.792839	16200	0.828645	700	0.0358056	3.7037	1.30933		51
16200	0.828645	16600	0.849105	400	0.0204604	2.1164	0.749718		52
16550	0.846547	9600	0.491049	-6950	-0.355499	36.7725	3.60475		53
9650	0.493606	9950	0.508951	300	0.0153453	1.5873	0.462035		54
9900	0.506394	9950	0.508951	50	0.00255754	0.26455	-1.32972		55
9950	0.508951	11150	0.570332	1200	0.0613811	6.34921	1.84833		56
10700	0.547315	11200	0.57289	500	0.0255754	2.6455	0.972861		57
11050	0.565217	10900	0.557545	-150	-0.00767263	0.793651	-0.231112		58
10900	0.557545	11300	0.578005	400	0.0204604	2.1164	0.749718		59
11100	0.567775	7450	0.381074	-3650	-0.186701	19.3122	2.96074		60
7250	0.370844	8650	0.442455	1400	0.0716113	7.40741	2.00248		61
8400	0.429668	9000	0.460358	600	0.0306905	3.1746	1.15518		62
8700	0.445013	9300	0.475703	600	0.0306905	3.1746	1.15518		63
8950	0.457801	7350	0.375959	-1600	-0.0818414	8.46561	2.13601		64
7200	0.368286	7650	0.391304	450	0.0230179	2.38095	0.867501		65
7750	0.396419	8700	0.445013	950	0.0485934	5.02646	1.61471		66
8500	0.434783	8850	0.452685	350	0.0179028	1.85185	0.616186		67
8700	0.445013	8900	0.455243	200	0.0102302	1.0582	0.0565704		68
8700	0.445013	9050	0.462916	350	0.0179028	1.85185	0.616186		69
9050	0.462916	9450	0.483376	400	0.0204604	2.1164	0.749718		70
9250	0.473146	9750	0.498721	500	0.0255754	2.6455	0.972861		71
9600	0.491049	7750	0.396419	-1850	-0.0946292	9.78836	2.28119		72
7400	0.378517	8550	0.43734	1150	0.0588235	6.08466	1.80577		73
8450	0.432225	9300	0.475703	850	0.0434783	4.49735	1.50349		74
8700	0.445013	9300	0.475703	600	0.0306905	3.1746	1.15518		75
8850	0.452685	9400	0.480818	550	0.028133	2.91005	1.06817		76
9050	0.462916	9700	0.496164	650	0.0332481	3.43915	1.23523		77
9350	0.478261	8000	0.409207	-1350	-0.0690537	7.14286	1.96611		78
7900	0.404092	8850	0.452685	950	0.0485934	5.02646	1.61471		79
8750	0.44757	9100	0.465473	350	0.0179028	1.85185	0.616186		80
9150	0.468031	9500	0.485934	350	0.0179028	1.85185	0.616186		81
9400	0.480818	8150	0.41688	-1250	-0.0639386	6.61376	1.88915		82
8000	0.409207	8800	0.450128	800	0.0409207	4.2328	1.44286		83
9000	0.460358	9100	0.465473	100	0.00511509	0.529101	-0.636577		84
9050	0.462916	9500	0.485934	450	0.0230179	2.38095	0.867501		85
9750	0.498721	7800	0.398977	-1950	-0.0997442	10.3175	2.33384		86
7950	0.40665	8250	0.421995	300	0.0153453	1.5873	0.462035		87
8700	0.445013	8700	0.445013	0	0	0	#NUM!		88
8850	0.452685	8700	0.445013	-150	-0.00767263	0.793651	-0.231112		89
9200	0.470588	9050	0.462916	-150	-0.00767263	0.793651	-0.231112		90
9550	0.488491	9500	0.485934	-50	-0.00255754	0.26455	-1.32972		91
9950	0.508951	9750	0.498721	-200	-0.0102302	1.0582	0.0565704		92
10150	0.519182	9950	0.508951	-200	-0.0102302	1.0582	0.0565704		93
9100	0.465473	7600	0.388747	-1500	-0.0767263	7.93651	2.07147		94
7850	0.401535	6550	0.335038	-1300	-0.0664962	6.87831	1.92837		95
6550	0.335038	7150	0.365729	600	0.0306905	3.1746	1.15518		96
7050	0.360614	7650	0.391304	600	0.0306905	3.1746	1.15518		97
7700	0.393862	8300	0.424552	600	0.0306905	3.1746	1.15518		98
8300	0.424552	8900	0.455243	600	0.0306905	3.1746	1.15518		99
8850	0.452685	9150	0.468031	300	0.0153453	1.5873	0.462035		100
9050	0.462916	9000	0.460358	-50	-0.00255754	0.26455	-1.32972		101
9050	0.462916	9750	0.498721	700	0.0358056	3.7037	1.30933		102
9750	0.498721	10050	0.514066	300	0.0153453	1.5873	0.462035		103

## Sheet: Phase Space & Poincare Map
Total Cells (same volume) Χν	Χν+1
500000	500000
500000	500000
500000	500000
500000	500000
500000	500000
500000	500000
500000	500000
500000	500000
500000	500000
500000	2.5e+06
2.5e+06	3750000
3750000	10000000
10000000	62500000
62500000	76250000
76250000	8.375e+07
8.375e+07	1.5875e+08
1.5875e+08	2e+08
2e+08	1.9625e+08
1.9625e+08	170000000
170000000	218750000
218750000	236250000
236250000	2.975e+08
2.975e+08	301250000
301250000	322500000
322500000	325000000
325000000	346250000
346250000	336250000
336250000	350000000
350000000	4.1875e+08
4.1875e+08	483750000
483750000	3.9125e+08
3.9125e+08	432500000
432500000	446250000
446250000	461250000
461250000	400000000
400000000	427500000
427500000	452500000
452500000	488750000
488750000	408750000
408750000	423750000
423750000	437500000
437500000	470000000
470000000	415000000
415000000	426250000
426250000	430000000
430000000	373750000
373750000	3.9375e+08
3.9375e+08	433750000
433750000	372500000
372500000	387500000
387500000	405000000
405000000	4.1375e+08
4.1375e+08	482500000
482500000	495000000
495000000	497500000
497500000	535000000
535000000	552500000
552500000	545000000
545000000	5.55e+08
5.55e+08	3.625e+08
3.625e+08	420000000
420000000	435000000
435000000	447500000
447500000	360000000
360000000	3.875e+08
3.875e+08	425000000
425000000	435000000
435000000	435000000
435000000	452500000
452500000	462500000
462500000	480000000
480000000	370000000
370000000	422500000
422500000	435000000
435000000	442500000
442500000	452500000
452500000	467500000
467500000	395000000
395000000	437500000
437500000	457500000
457500000	470000000
470000000	400000000
400000000	450000000
450000000	452500000
452500000	487500000
487500000	3.975e+08
3.975e+08	435000000
435000000	442500000
442500000	460000000
460000000	477500000
477500000	497500000
497500000	507500000
507500000	455000000
455000000	3.925e+08
3.925e+08	327500000
327500000	352500000
352500000	3.85e+08
3.85e+08	4.15e+08
4.15e+08	442500000
442500000	452500000
452500000	4.525e+08
4.525e+08	4.875e+08

[truncated: 3 more sheets: First Return Map_matrix, Poincare Map_ first return map, FACS]
